# Supplementary material
Source: PubMed Central journal article supplement (PMC7864586)
Supplement: NIHMS1661572-supplement-1.pdf [file NIHMS1661572-supplement-1.pdf]

717

718

719

720

## Supplementary Materials for

721

722

### **Steps toward translocation-independent RNA polymerase inactivation by terminator ATPase $\rho$**

723

724

725

Nelly Said, Tarek Hilal, Nicholas D. Sunday, Ajay Khatri, Jörg Bürger, Thorsten Mielke,  
Georgiy A. Belogurov, Bernhard Loll, Ranjan Sen, Irina Artsimovitch, Markus C. Wahl

726

727

728

Correspondence to: artsimovitch.1@osu.edu; markus.wahl@fu-berlin.de

729

730

#### **This PDF file includes:**

731

732

Materials and Methods

733

Figs. S1 to S12

734

Tables S1 to S5

735

Captions for Movies S1 to S2

736

737

#### **Other Supplementary Materials for this manuscript include the following:**

738

739

Movies S1 to S2

740

## 741 **Materials and Methods**

### 742 Protein production for transcription assays

743 Plasmids used for protein production are listed in Table S4. For transcription assays, WT  
744 RNAP and variants were purified as described previously (55), following expression in XJb  
745 (DE3) strain (Zymo Research). For purification of  $\Delta\omega$  RNAP, a  $\Delta rpoZ$  XJb strain was  
746 constructed by P1-mediated transduction of the *rpoZ::kan* allele from a Keio knockout  
747 collection (56).

748 For production of NusG<sup>ΔHL</sup>, XJB cells were transformed with pMT037, grown to OD<sub>600</sub>=0.4  
749 and induced with 0.5 mM IPTG for 3 hours at 37 °C. Cells were resuspended in LysT buffer  
750 (50 mM Tris-Cl, 500 mM NaCl, 5 % [v/v] glycerol, 20 μM PMSF, pH 6.9) supplemented with  
751 1X EDTA-free Complete Protease Inhibitors cocktail (Roche), disrupted *via* sonication and  
752 cleared *via* centrifugation. The cleared extract was applied to a 1 ml HisTrap HP column (GE  
753 Healthcare) and eluted with a shallow gradient with LysT buffer supplemented with 1 M  
754 imidazole. Fractions containing NusG<sup>ΔHL</sup> were pooled and applied to a Superdex 75 gel  
755 filtration column (GE Healthcare) equilibrated with 2X storage buffer (0.02 M Tris-Cl, 5 %  
756 [v/v] glycerol, 0.02 mM EDTA, 0.2 M NaCl, 0.2 mM DTT, pH 7.9). Fractions containing  
757 NusG<sup>ΔHL</sup> were pooled and mixed 1:1 with 100 % glycerol.

758

### 759 Production of ρ-EC for cryoEM analysis

760 Protein components of ρ-ECs and variants thereof were produced and purified as described  
761 before (24, 57). RNA containing the λ tR1 *rut* region was produced by *in vitro* transcription and  
762 purified as described before (57). Scaffold DNA oligomers were purchased from Eurofins.

763 For ρ-EC formation, equimolar amounts of template DNA and *rut* RNA were mixed in 10  
764 mM Tris-Cl, 40 mM KCl, 5 mM MgCl<sub>2</sub>, pH 8.0, heated to 95 °C for 5 min and subsequently  
765 cooled to 25 °C at 1 °C/min (Fig. S2B). The annealing product was incubated in running buffer

766 (20 mM Tris-Cl, 120 mM KOAc, 5 mM Mg(OAc)<sub>2</sub>, 10 μM ZnCl<sub>2</sub>, 2 mM DTT, pH 8.0) with  
767 RNAP in a 1.3:1 molar ratio on ice for 10 min, then at 32 °C for 10 min. An equimolar amount  
768 of non-template DNA was added and incubated for another 5 min. Afterwards, a threefold molar  
769 excess of NusA and NusG was added, followed by incubation at 32 °C for 15 min. The mixture  
770 was chromatographed on a Superdex 200 Increase 3.2/300 gel filtration column (GE  
771 Healthcare) in running buffer, and fractions containing NusA/NusG-EC were pooled.  
772 NusA/NusG-EC was mixed with a threefold molar excess of ρ hexamer, and the mixture was  
773 incubated at 32 °C for 15 min. 1 mM ADP-BeF<sub>3</sub> was then added to the sample, followed by  
774 incubation at 18 °C for 5 min.

775

#### 776 Single-particle cryoEM data collection, processing and structural analysis

777 Freshly prepared ρ-ECs (5 mg/ml) were supplemented with n-octylglucoside to a final  
778 concentration of 0.15 % (w/v) immediately before grid preparation to overcome preferred  
779 particle orientation. 3.8 μl of the sample were applied to plasma-treated Quantifoil R1/4 holey  
780 carbon grids, blotted and plunged into liquid ethane using an FEI Vitrobot Mark IV at 10 °C/100  
781 % humidity. Data were acquired on a 300 kV FEI Tecnai G<sup>2</sup> Polara cryo-transmission electron  
782 microscope, equipped with a Gatan K2 Summit direct electron detector in super-resolution  
783 mode, with a pixel size of 0.62 Å on the object scale. A total electron dose of 50 e<sup>-</sup>/Å<sup>2</sup> was  
784 accumulated during a 10 s exposure. During four independent imaging sessions, a total of 9887  
785 movies were acquired automatically using Leginon (58).

786 Dose-weighted, aligned micrographs were calculated with MotionCor2 (59), ctf estimation  
787 was done with Gctf (60). Data analysis was done within the cryoSPARC2 framework (61).  
788 Manually picked particle images were used to generate an initial template for reference-based  
789 particle picking (2,112,813 particle images). Particle images were extracted with a box size of  
790 600 px and binned to 100 px, yielding a pixel-size of 3.72 Å/px. 2D classification was applied

791 to remove obviously false-positive picks. A small subset of particles belonging to the best class  
792 averages were used for an *ab initio* reconstruction, which was further used as starting reference  
793 for iterative, heterogeneous 3D classification (21). A final dataset of 389,380 particle images  
794 representing  $\rho$ -ECs was re-extracted with a box of 300 px and homogeneously refined to 3.75  
795 Å resolution. Particle coordinates and refinement parameters were exported using pyem (62)  
796 and used for extraction of particles with RELION (63), binned to a box size of 100 px. 3D  
797 classification was conducted with cisTEM (64) to isolate the nine complexes described here by  
798 a combination of global and focused classifications. Particle orientation parameters were not  
799 refined during the entire hierarchical classification procedure. Particle images belonging to each  
800 complex were individually subjected to non-uniform refinement in cryoSPARC2 at a box size  
801 of 300 px to yield the final reconstructions.

802

### 803 Model building and refinement

804 Coordinates for  $\rho$ -EC components from previously determined sub-structures were docked  
805 into the cryoEM maps using Coot (65). Proteins and nucleic acids were manually rebuilt into the  
806 cryoEM densities. Structural models were manually adjusted residue-by-residue, supported by  
807 real space refinement in Coot. The manually built models were refined against the cryoEM maps  
808 using the real space refinement protocol in PHENIX (66). To avoid overfitting, the weighting  
809 factor between model geometry and data applied during real-space refinement was optimized  
810 by refining the model against one half-set of the data and comparing cross-resolutions between  
811 the refined model with this half-set ( $FSC_{work}$ ) and the unused half-set ( $FSC_{test}$ ). Deviations in  
812  $FSC_{work}$  and  $FSC_{test}$  curves indicate overfitting and should be minimal. A weighting factor of 1  
813 was determined to be optimal (Fig. S6) and used for final refinement of the model into the map  
814 of the full dataset. Structure figures were prepared using PyMOL (Version 1.8 Schrödinger,  
815 LLC).

816

817 Structure comparisons

818 Structures were compared and RMSD values were calculated by global superposition of  
819 complex structures or by superposition of selected subunits in complexes using the “secondary  
820 structure matching” algorithm implemented in Coot or the “align” algorithm implemented in  
821 PyMOL.

822

823 Transcription assays

824 RNAP holoenzymes were assembled by mixing core RNAP (wild-type or mutationally  
825 altered) with a threefold molar excess of  $\sigma^{70}$  transcription initiation factor, followed by  
826 incubation at 30 °C for 20 min. Phage  $\lambda$  tR1 DNA template was generated by PCR amplification  
827 and purified by PCR cleanup kit (QIAGEN). Halted A26 ECs were formed at 37 °C for 12 min  
828 by mixing 40 nM RNAP holoenzyme with 20 nM  $\lambda$  tR1 DNA template, 100  $\mu$ M ApU, 10  $\mu$ M  
829 ATP and UTP, 2  $\mu$ M GTP, and 5 Ci/mmol [ $\alpha^{32}$ P]-GTP in  $\rho$  termination buffer (40 mM Tris-Cl,  
830 50 mM KCl, 5 mM MgCl<sub>2</sub>, 0.1 mM DTT, 3 % (v/v) glycerol, pH 7.9).  $\rho$ , NusA, and NusG were  
831 added to 20, 100, or 300 nM, respectively, and the reactions incubated for an additional 3 min  
832 at 37 °C. While NusA, NusG, and WT RNAP activities remain constant over extended (10  
833 years) storage at -20 °C, the  $\rho$  activity declines more noticeably (~20% after 2 years). Since this  
834 may result in experimental variability, we perform each assay with the WT RNAP as a control.  
835 In assays with RNAP mutants shown here, the termination efficiency for the WT RNAP  
836 remained constant:  $82.8 \pm 2.2\%$  (n=12). However, in experiments with “old”  $\rho$  in Fig. 2B,  
837 termination was reduced. Thus, if absolute  $\rho$  activity is important, single-use aliquots should be  
838 used. In Fig. S1A, GreA, RapA, and Mfd were added at 1  $\mu$ M; GreB – at 200 nM. Transcription  
839 was restarted by addition of a pre-warmed (37 °C) mixture containing all four NTPs and  
840 rifapentin to a final concentration of 200  $\mu$ M and 50  $\mu$ g/ml, respectively (except for Fig. 7D,

841 where NTPs were titrated), and incubated at 37 °C for 6 min. Reactions were quenched by  
842 addition of an equal volume of stop buffer (45 mM Tris-borate, 10 M urea, 20 mM EDTA, 0.2  
843 % xylene cyanol, 0.2 % bromophenol blue, pH 8.3) and separated by denaturing 5 % PAGE (7  
844 M urea, 0.5X TBE). Gels were dried and products were visualized using a Typhoon FLA 9000  
845 PhosphorImaging system (GE Healthcare Life Sciences). Readthrough and termination RNA  
846 products were quantified with ImageQuant and Microsoft Excel software.

847

#### 848 Analytical size exclusion chromatography

849 For interaction tests between RNAP, NusA and  $\rho$ , proteins were mixed in running buffer (20  
850  $\mu$ M final concentration) and incubated at 32 °C for 15 min. For testing  $\rho$  interaction with EC  
851 harboring *rut* RNA, EC was assembled and purified as described for cryoEM and incubated  
852 with  $\rho$  at 32 °C for 15 min. Mixtures were chromatographed on a Superose 6 Increase 3.2/300  
853 column (GE Healthcare) with a flow rate of 40  $\mu$ l/min, and 50  $\mu$ l fractions were collected.  
854 Fractions were analyzed by 15 % SDS-PAGE gels and urea-PAGE.

855

#### 856 Genetic screens, growth analysis and *in vivo* termination assays

857 Bacterial strains, plasmids and phages are listed in Table S5. All growth and *in vivo*  
858 transcription termination assays were done with *E. coli* MC4100 (RS1428) and derivatives.  
859 RS1428 produces  $\rho^{WT}$  and contains a  $P_{RM}$ -*racR-trac-lacZYA* cassette as a single-copy lysogen at  
860 the  $\lambda$  attachment site. It was made *rpoC<sup>ts</sup>* by P1 transduction (*rpoC*,  $\beta'$  gene), resulting in strain  
861 RS1606. The  $P_{RM}$ -*racR-trac-lacZYA* cassette was inserted at the  $\lambda$  attachment site of RS1714  
862 that produces  $\rho^{Y80C}$  by  $\lambda$ RS45 phage-mediated transduction, resulting in RS1729. This strain  
863 was subsequently made *rpoC<sup>ts</sup>* by P1 transduction to construct RS1758.

864 Plasmid pBAD18M containing *rpoC<sup>WT</sup>* was transformed into the XL1-red mutator strain  
865 (67). A mutagenized plasmid library was isolated and electroporated into RS1758. After plating

866 on LB agar, transformants were transferred to MacConkey-lactose plates and grown at 37 °C.  
867 Synthetically defective *rpoC* mutants were identified as red colonies (*lac+* phenotype).  
868 ~100,000 colonies were screened. Plasmids were isolated and sequenced to identify mutations  
869 in *rpoC*. This screening yielded one positive mutant, *rpoC-G82D*. Additional *rpoC* mutants were  
870 constructed by site-directed mutagenesis of pBAD18M-*rpoC*<sup>WT</sup>.

871 To assess synthetic growth defects, strains RS1606 ( $\rho^{\text{WT}}$ ) and RS1758 ( $\rho^{\text{Y80C}}$ ) were  
872 transformed with the pBAD18M plasmids expressing WT or mutant *rpoC*. Transformants were  
873 streaked at 30, 37, and 42 °C. The chromosomal *rpoC*<sup>ts</sup> allele is inactive at 37 °C and above.  
874 *rpoC* mutant strains exhibiting clear growth defects with  $\rho^{\text{Y80C}}$  were spotted in serial dilutions  
875 on LB agar plates and incubated at 37 °C to further quantify the synthetic growth defects. To  
876 estimate termination defects of  $\rho^{\text{WT}}$  and  $\rho^{\text{Y80C}}$  in the presence of  $\beta'$  variants, we quantified  $\beta$ -  
877 gal produced from the *P<sub>RM</sub>-l<sub>trac</sub>-lacZYA* terminator fusion cassette using strains RS1606 ( $\rho^{\text{WT}}$ )  
878 and RS1758 ( $\rho^{\text{Y80C}}$ ) at 37 °C (68).

879

#### 880 Quantification and statistical analysis

881 For quantification of experimental results based on gel analyses, at least three independent  
882 experiments were conducted using the same biochemical samples. Gels were scanned using a  
883 Typhoon FLA 9000 PhosphorImaging system (GE Healthcare Life Sciences). RNA products  
884 were quantified with ImageQuant. Means, SD, and t-test values were calculated using Excel  
885 (Microsoft). Error analyses for the  $\beta$ -galactosidase and growth assays were also performed  
886 using Excel.

887



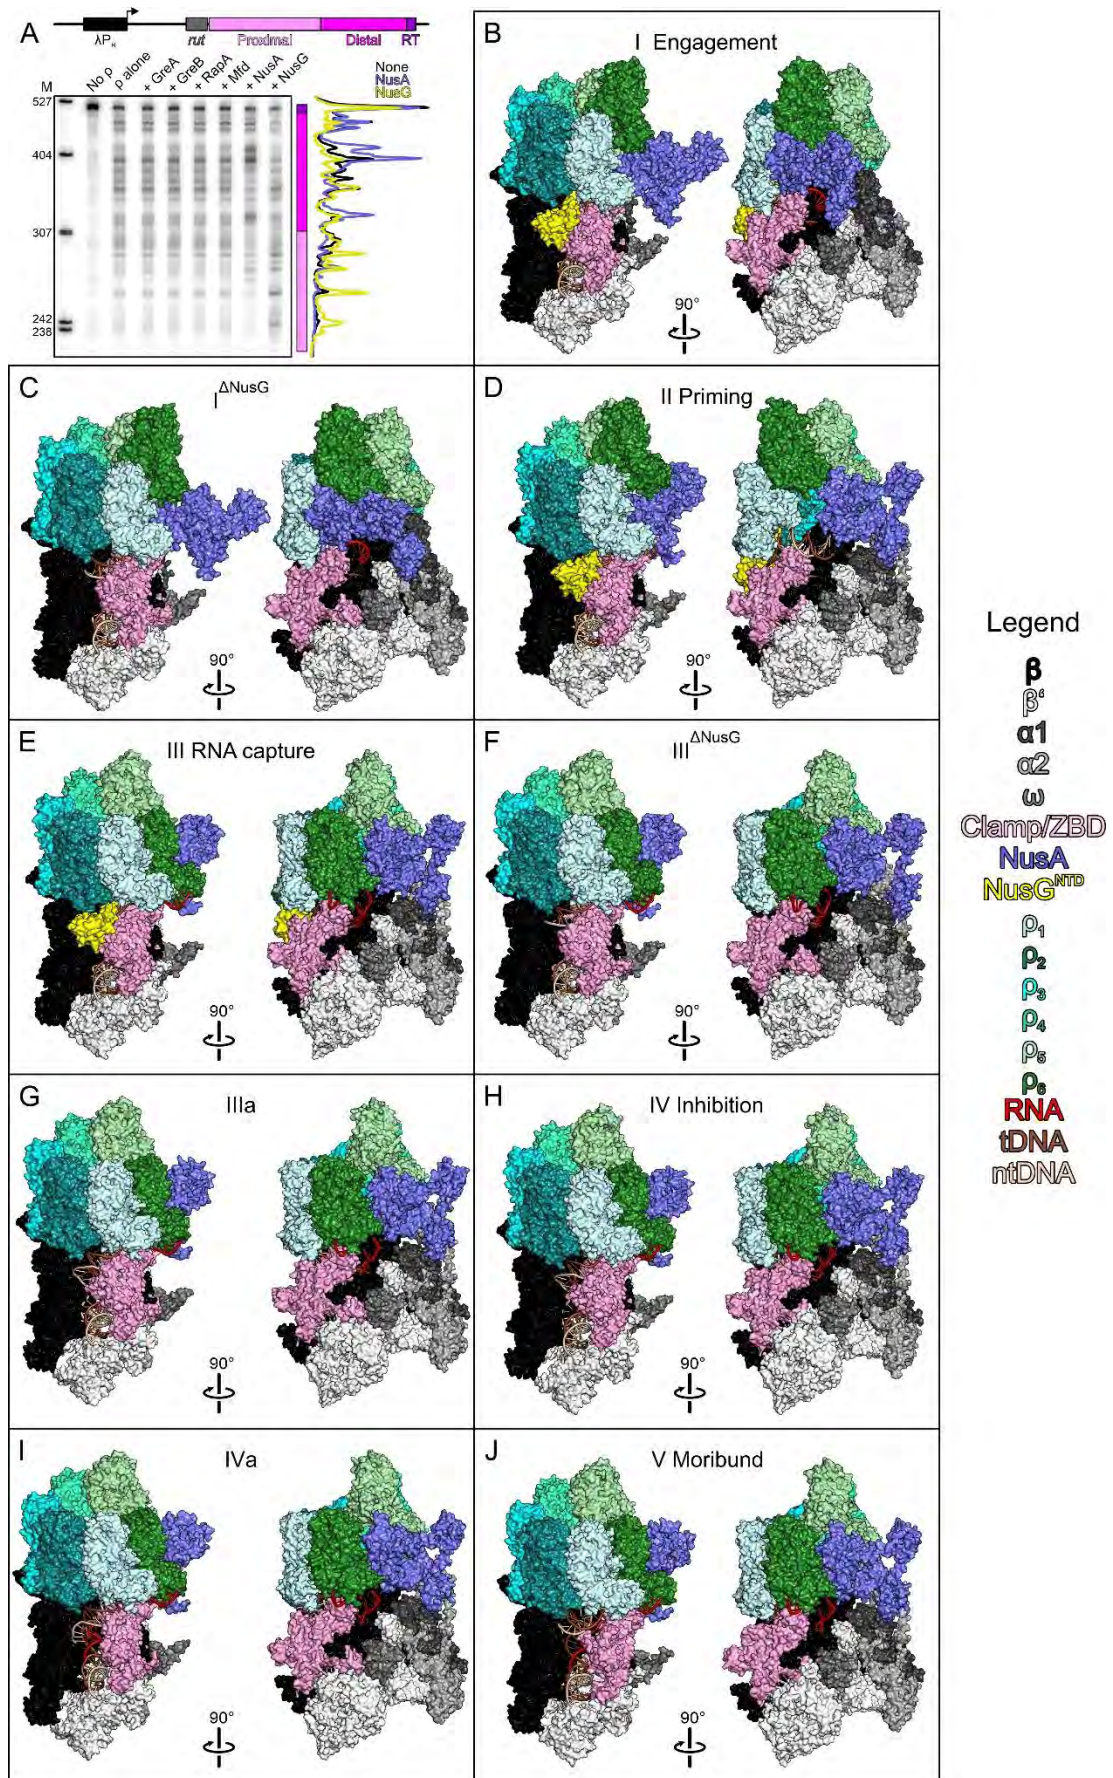



890

891 **Fig. S1.  $\rho$  terminates NusA/NusG-modified ECs.** (A) Schematic of the  $\lambda$  tR1 DNA template  
892 and effects of  $\rho$  on single-round *in vitro* transcription by *E. coli* RNAP alone or in the presence  
893 of the indicated general transcription factors. In this and the following figures: RT, readthrough;  
894 M, pBR322 *MspI* marker (nts); proximal termination zone, pink; distal termination zone,  
895 magenta; RT, purple. Right, gel traces for  $\rho$  acting on RNAP alone (black), with NusA (slate  
896 blue), or with NusG (yellow); traces with other factors were superimposable with that of RNAP  
897 alone. (B-J) Orthogonal surface views (nucleic acids as cartoon) of the indicated complexes.  
898 Key elements are labeled. Complexes were superimposed based on the  $\beta$  subunits. dDNA,  
899 downstream DNA; prox./dist. uDNA, proximal/distal upstream DNA. Color-coding in this and  
900 the following figures: RNAP subunits, different shades of gray;  $\beta'$  clamp, pink;  $\rho$  subunits,  
901 different shades of green/cyan; NusA, slate blue; NusG, yellow; template DNA, brown; non-  
902 template DNA, beige; RNA, red.

903

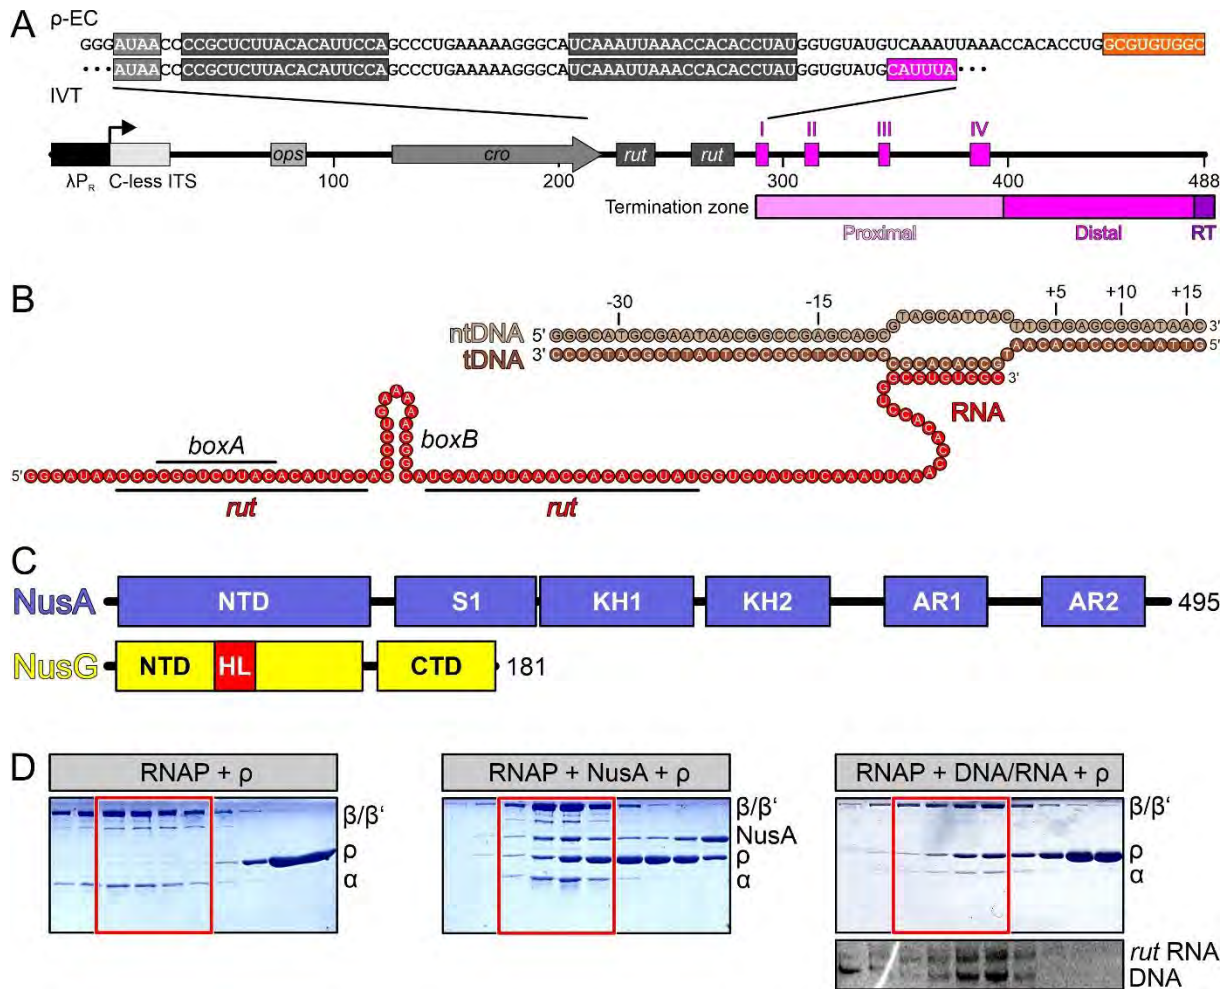

904

905

906 **Fig. S2. Nucleic acids, proteins,  $\rho$  recruitment and EC inhibition.** (A) Schematic of the  $\lambda$

907 tR1 DNA template used for *in vitro* transcription (IVT) assays in this and previous studies (13,

908 69). RNAP that initiates at the  $\lambda P_R$  promoter is stalled at the end of an initial transcribed

909 sequence (ITS) in the absence of CTP, allowing synchronization of ECs for single-round assays.

910 Positions of the *rut* sites, the proximal and distal termination windows, and the RT RNA are

911 indicated; major release sites I/II/III/IV (69) are shown. Sequences of *rut* RNA regions

912 transcribed from this template (IVT) and used to assemble  $\rho$ -ECs for cryoEM analysis ( $\rho$ -EC)

913 are shown at the top; the 3'-segment of RNA that anneals to the tDNA is boxed in orange. (B)

914 Nucleic acid scaffold used for the assembly of  $\rho$ -ECs. The *boxA/boxB* RNA elements employed

915 in the assembly of the phage  $\lambda$  anti-termination complex (24) are also shown. (C) Domain

916 organization of NusA and NusG. HL, NusG HL; numbers, C-terminal residues. (D) SDS-PAGE

917 (proteins) and urea-PAGE (nucleic acids) gels monitoring  $\rho$  binding to RNAP (left),  
918 RNAP/NusA (middle) and unmodified EC (right). Red boxes indicate identical fractions of the  
919 runs, in which RNAP peaks.

920

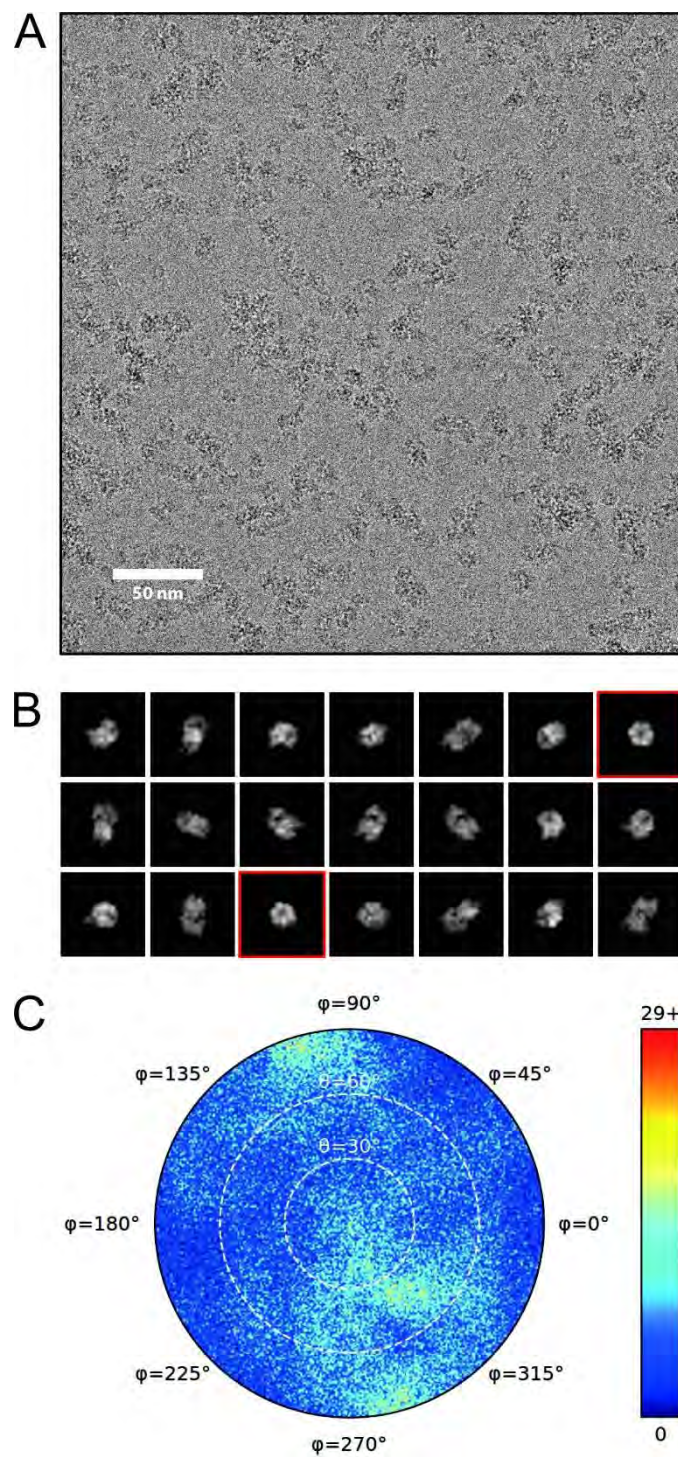

922

923

924 **Fig. S3. CryoEM imaging of  $\rho$ -ECs.** (A) Representative cryoEM micrograph of  $\rho$ -ECs. Scale

925 bar, 50 nm. Well-separated particles are predominant. Particles with different views can be

926 seen, suggesting random orientation. (B) Top 2D class averages of the  $\rho$ -ECs. Views from all

927 sides of the complex can be found. In the top views, the  $\rho$  hexamer can be discerned (red boxes).  
928 (C) Angular distribution plot of the homogeneously refined  $\rho$ -EC used for subsequent  
929 classification with cisTEM, revealing an even distribution of viewing directions with only  
930 limited preference.  
931

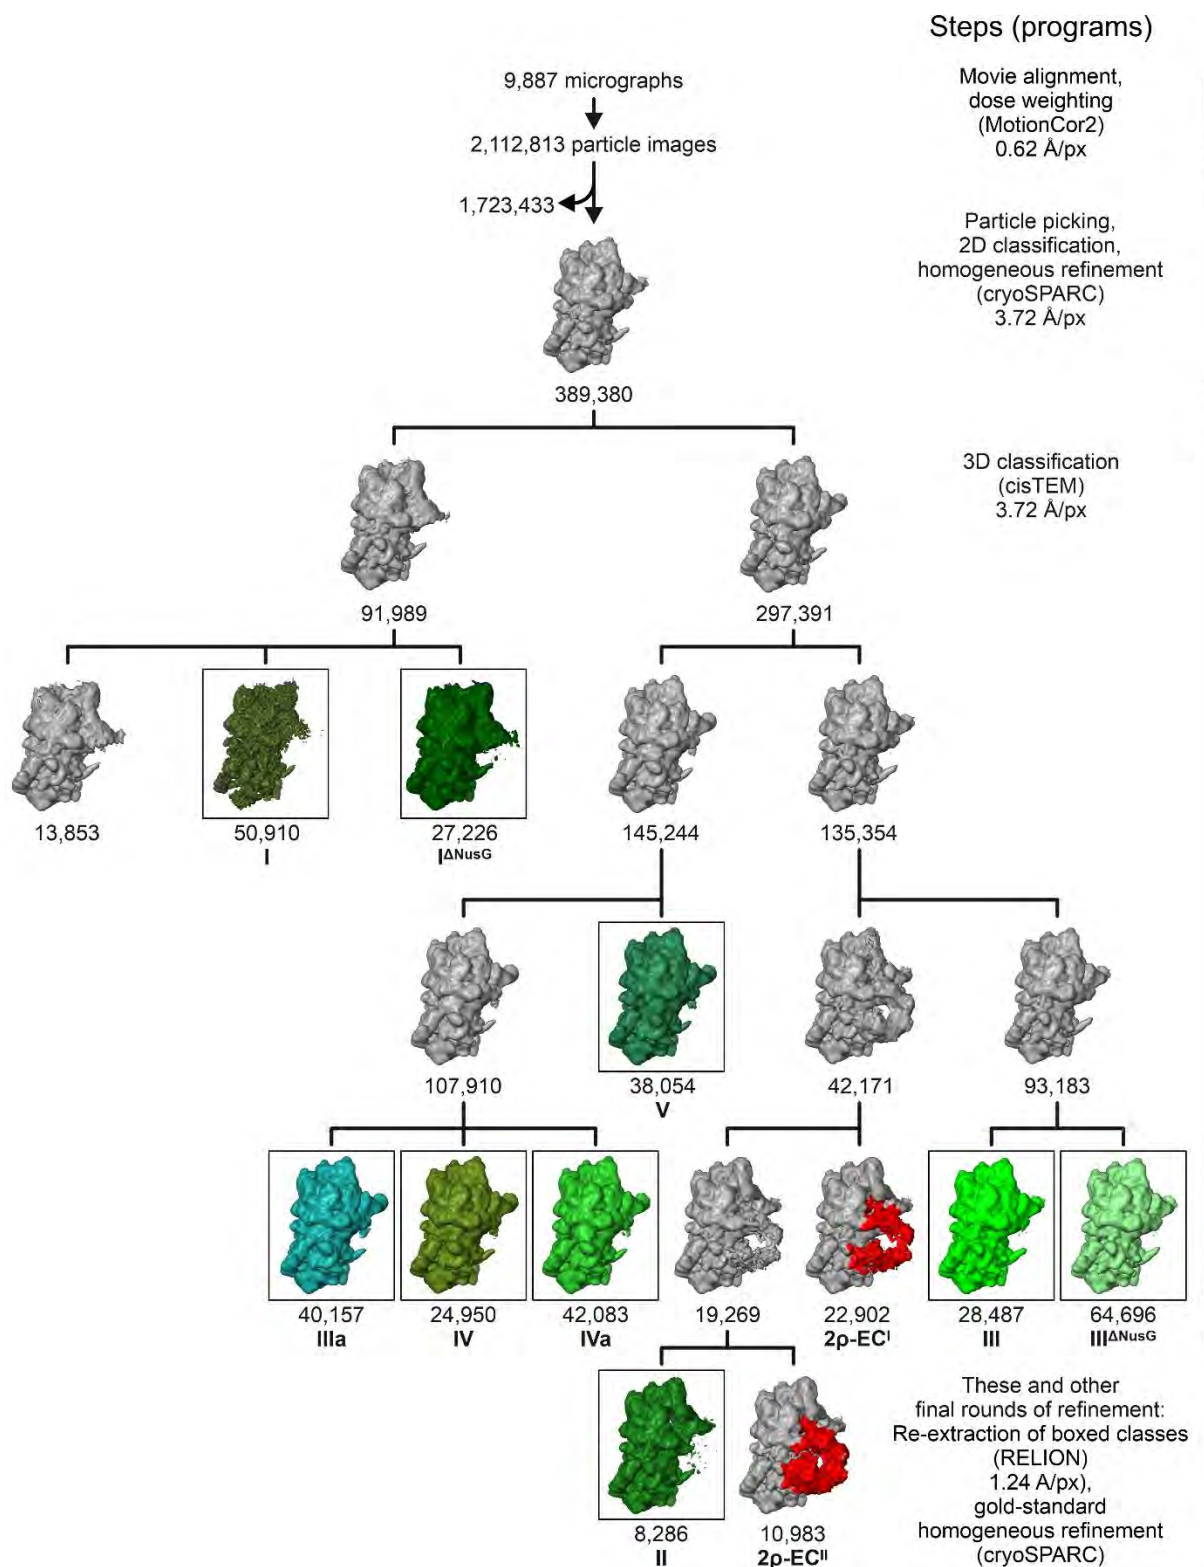

932

933

934 **Fig. S4. Hierarchical clustering analysis.** A total of 9887 micrographs was used to iteratively  
 935 select 389,380 particle images representing  $\rho$ -ECs. In subsequent 3D classification cycles  
 936 without refinement, separation was first based on global differences, such as the rotational state

937 of the  $\rho$  hexamer, followed by focused classification on local differences, using spherical masks  
938 enclosing the region of interest. Boxed structures in shades of green represent the nine final  
939 classes used for further structural analyses in this study (names indicated). Two additional  
940 classes,  $2\rho$ -EC<sup>I</sup> and  $2\rho$ -EC<sup>II</sup>, have weak cryoEM density for a second  $\rho$  hexamer (colored red)  
941 bound to NusA and the RNAP  $\beta'$  jaw in addition to  $\rho$  observed at the main position. Although  
942 higher-order  $\rho$  oligomers had been reported *in vitro* (70), determining whether two  $\rho$  hexamers  
943 can act on the same EC *in vivo* is beyond the present scope of our manuscript. For better  
944 visualization, all maps were filtered to 8 Å resolution.  
945



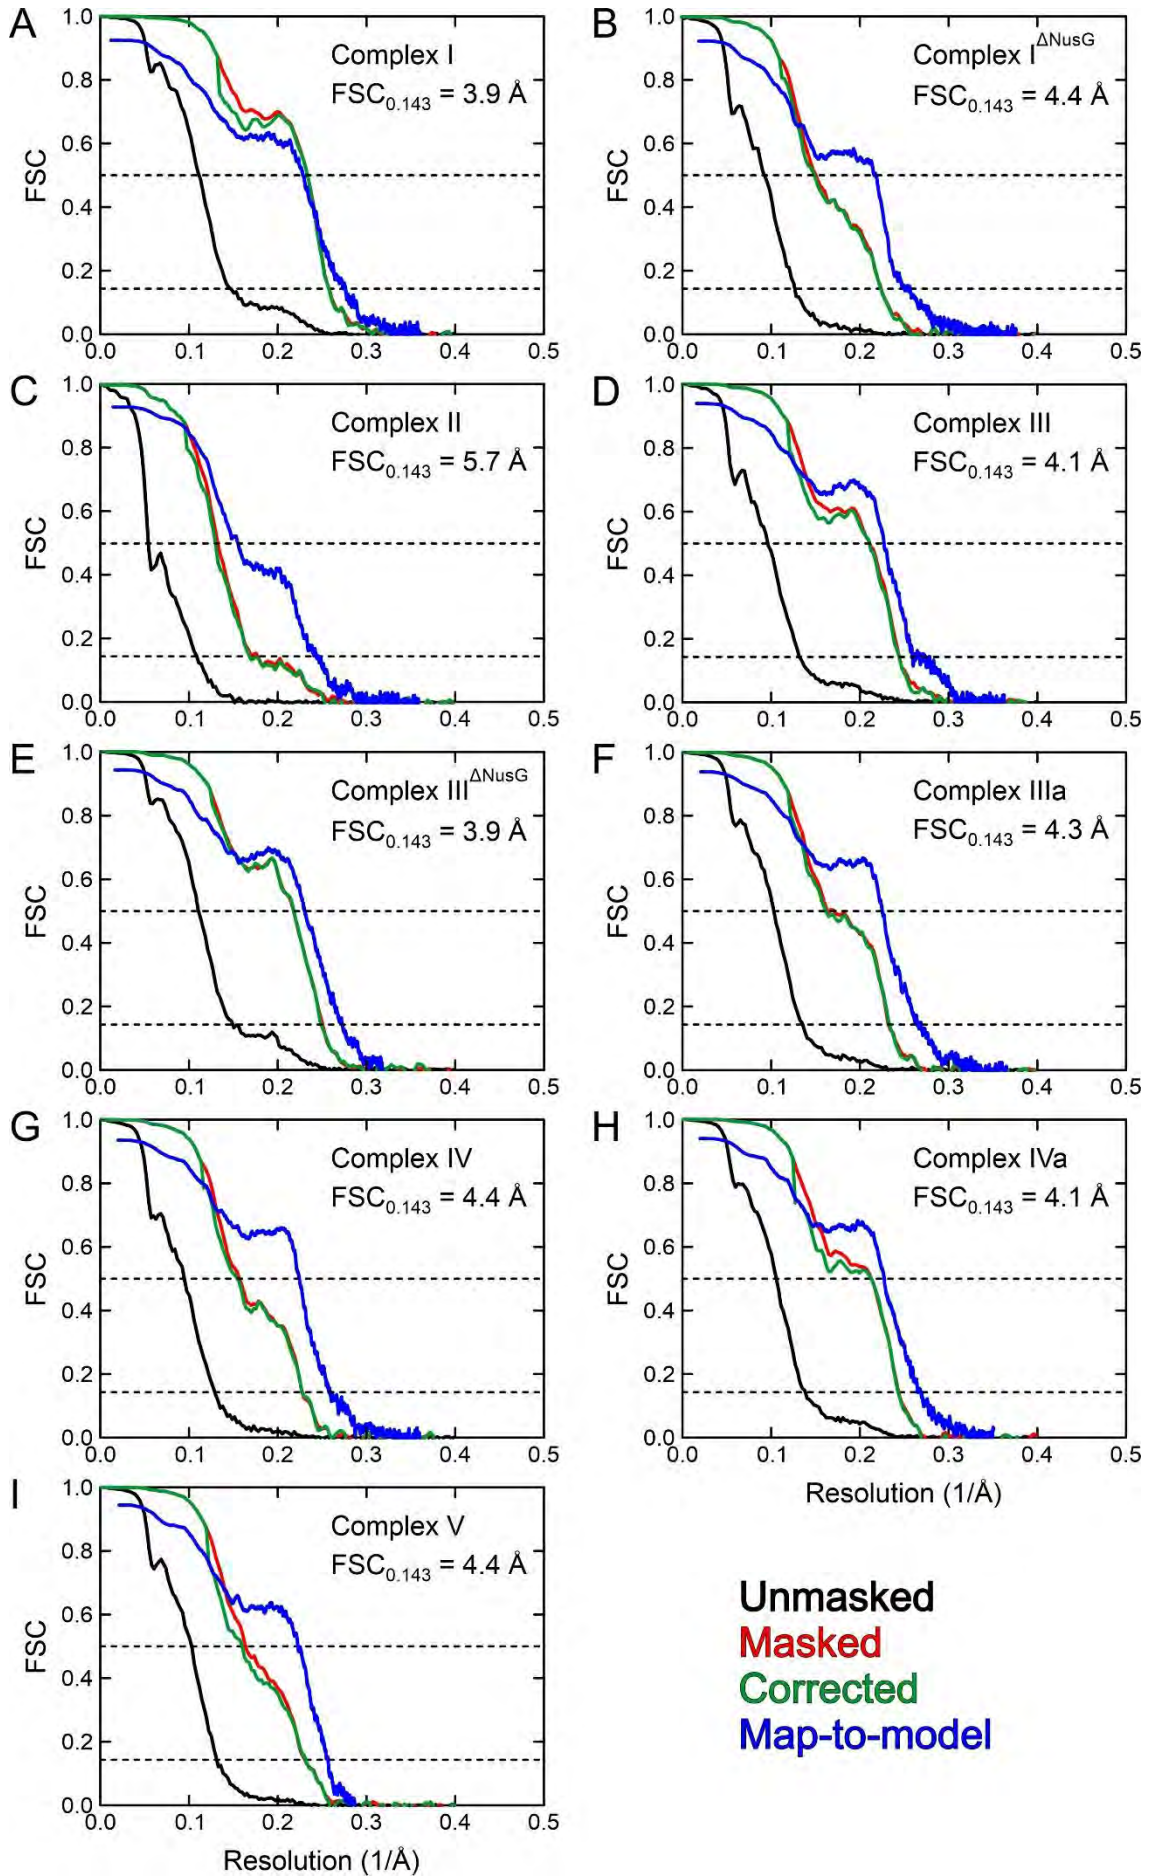

947

948 **Fig. S5. Resolution limits.** (A-I) Global resolution estimates represent gold-standard Fourier-  
949 shell correlation (FSC) after refinement with cryoSPARC2 (61) of the nine refined complexes  
950 (names indicated). Global resolutions vary between 3.9 Å for complexes I and III<sup>ANusG</sup> and 5.7  
951 Å for complex II. Black curves were calculated without masking. Red curves were calculated  
952 after application of a soft solvent mask dilated by 6 Å. Green curves were calculated with phase  
953 randomization to correct for mask-induced correlations. Blue curves represent cross-resolutions  
954 between the refined model and the experimental electron density as determined with PHENIX.  
955

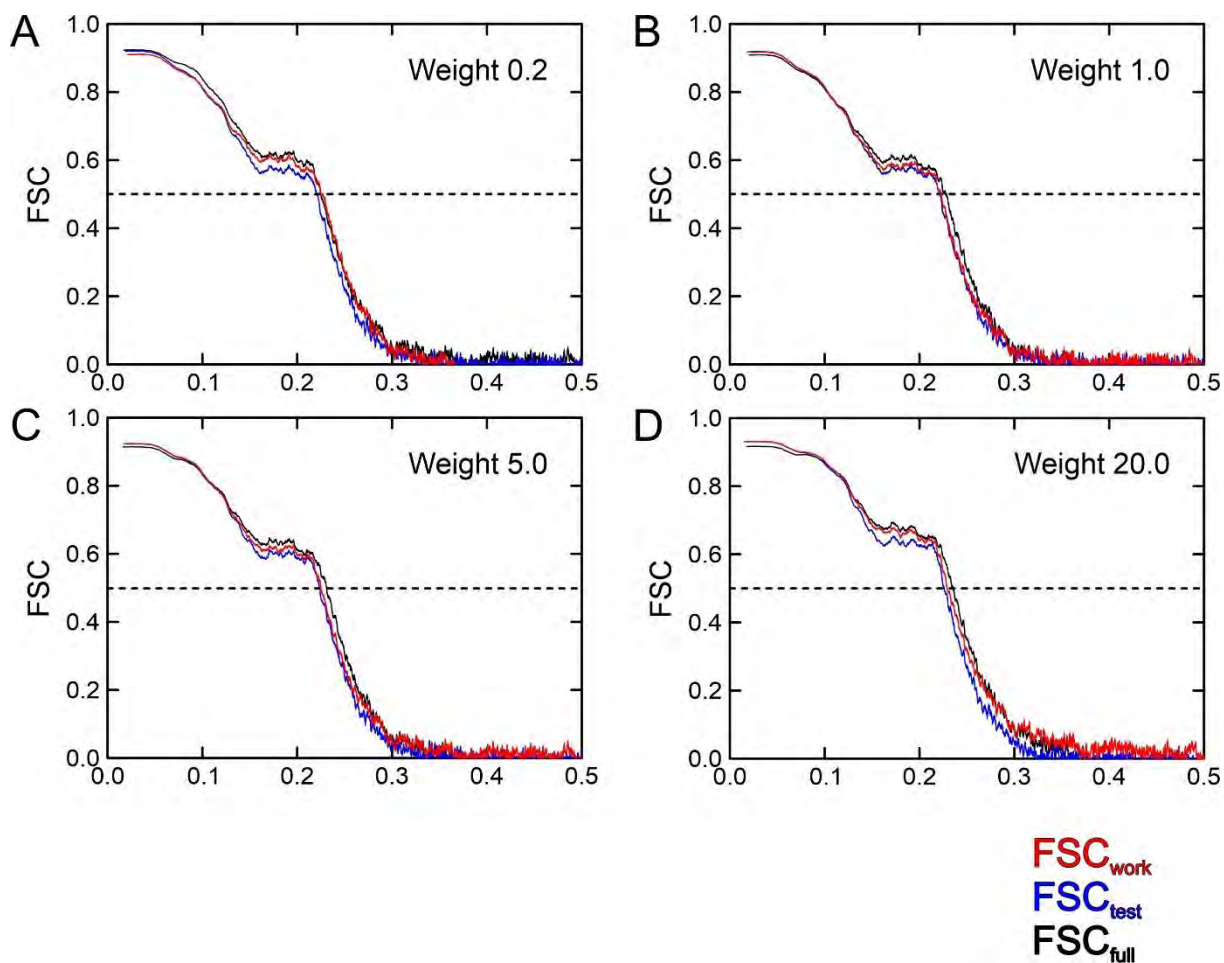

956

957

958 **Fig. S6. Monitoring of overfitting during real-space refinement.** (A-D) Example (complex  
 959 I) for the optimization of weighting between geometry restraints and electron density map  
 960 during real space refinement in PHENIX. Cross-resolution between the half-map used for  
 961 refinement and refined model ( $FSC_{work}$ , red line) is compared with the cross-resolution between  
 962 refined model and the unused half-map ( $FSC_{test}$ , blue line). Final refinement was carried out  
 963 against the full map utilizing all particle images ( $FSC_{full}$ , black line). The tested weighting  
 964 factors were 0.2 (A), 1 (B), 5 (C) and 20 (D). Deviations between  $FSC_{work}$  and  $FSC_{test}$  indicate  
 965 overfitting of the model, showing minimal overfitting for a weight of 1.

966



90°  
↻

90°  
↻

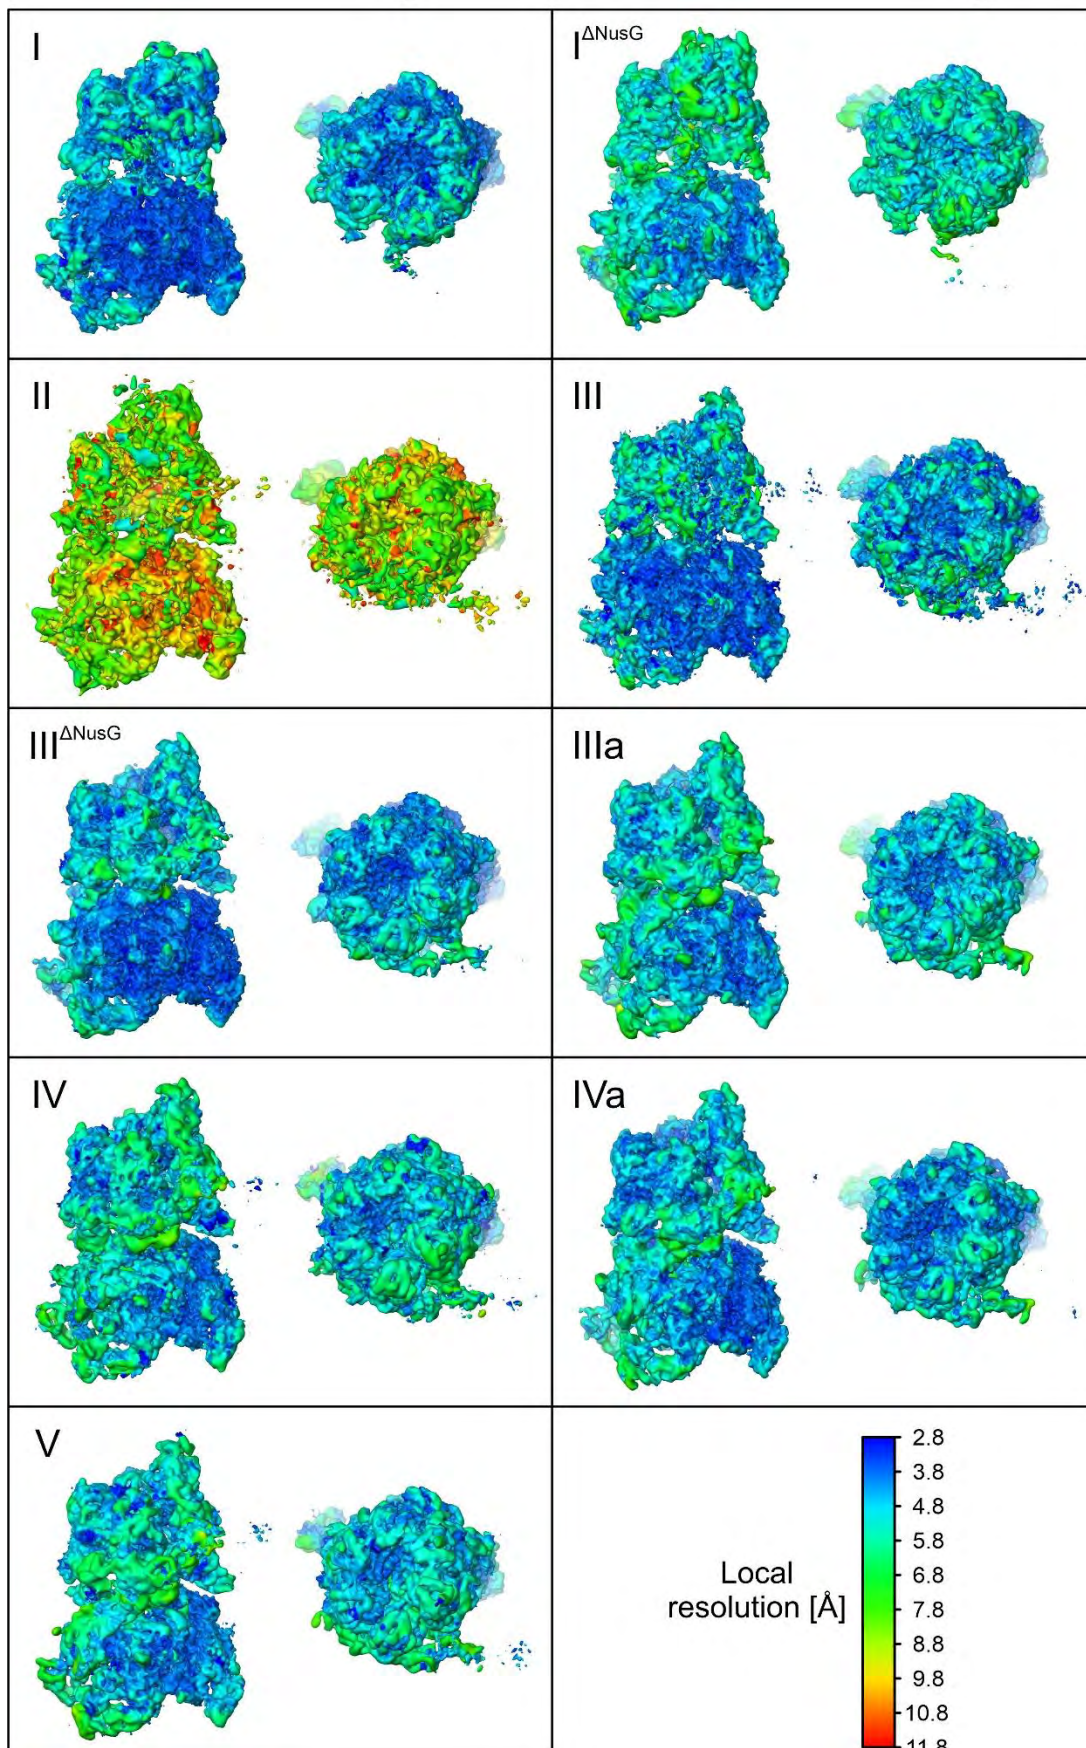

968

969 **Fig. S7. Local resolutions.** CryoEM maps of the nine refined complexes (names indicated)  
970 colored by local resolutions (see legend) as estimated by cryoSPARC2. Local resolutions show  
971 variations across the reconstructions for all complexes, ranging from below 3 Å in some RNAP  
972 cores to 8-12 Å in some peripheral regions. For display, maps were filtered according to local  
973 resolution estimates.

974



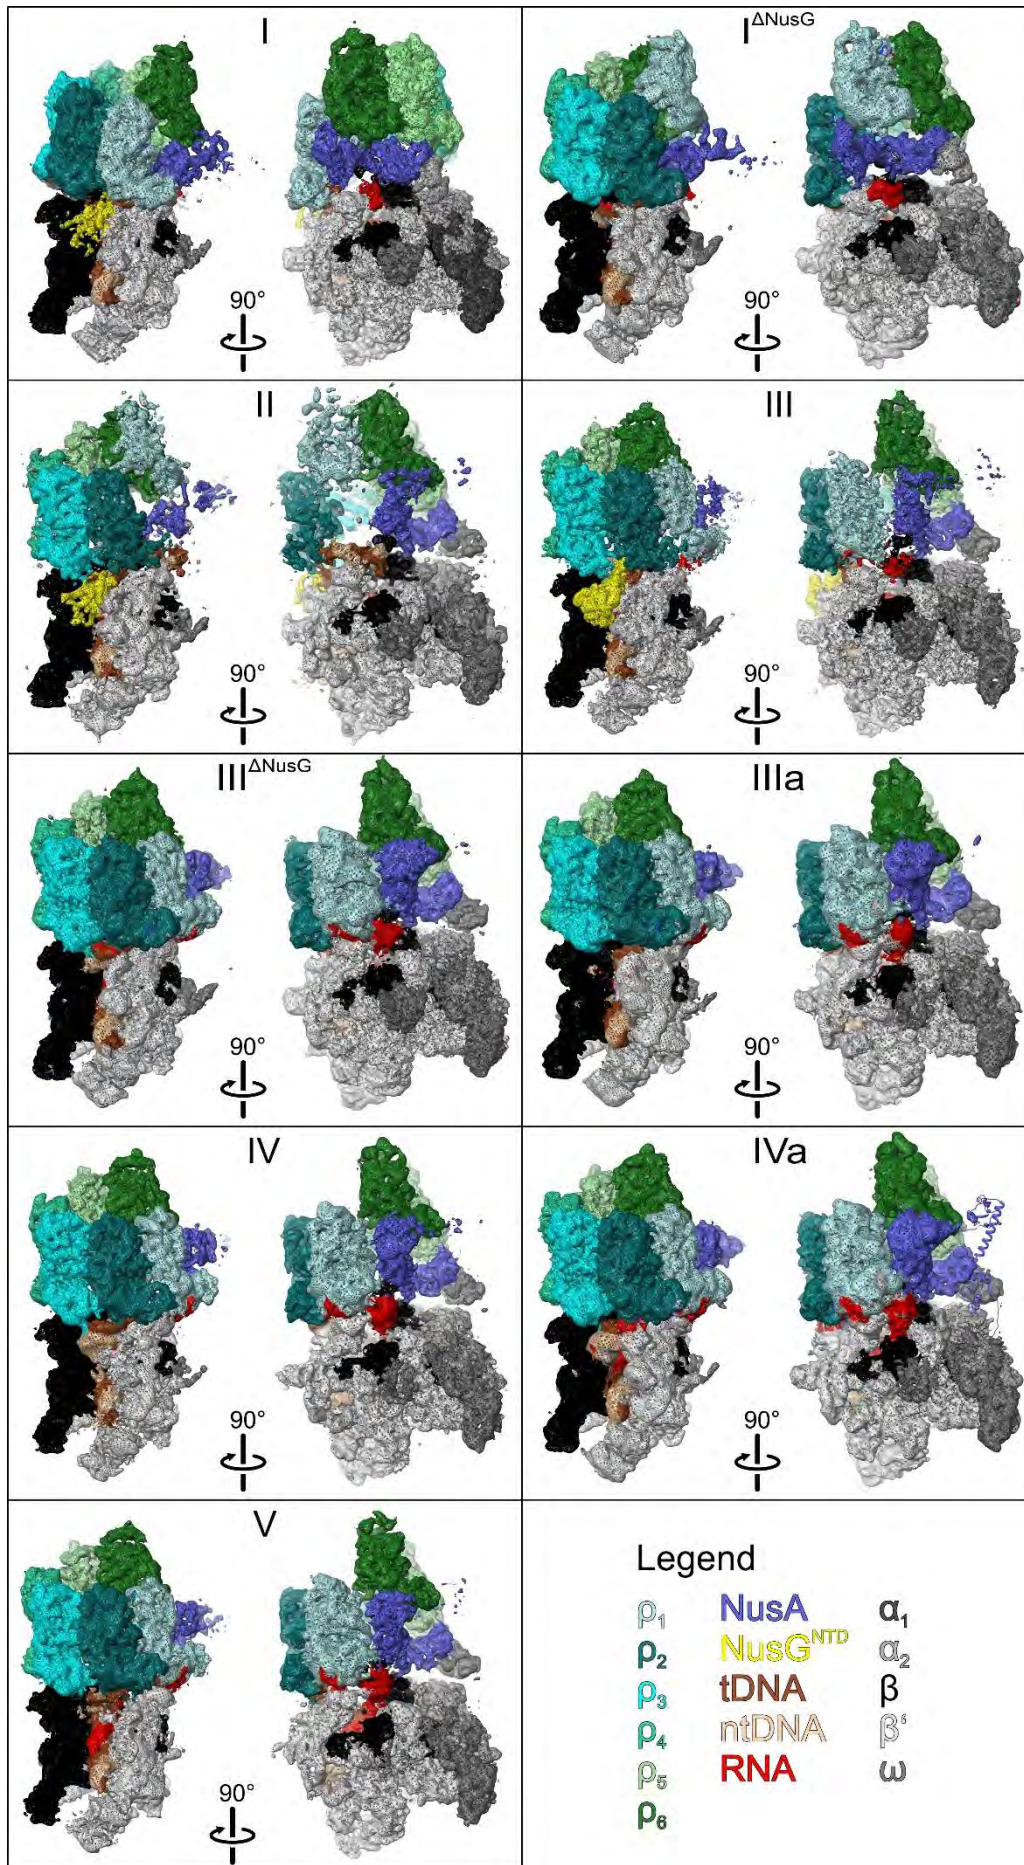

976

977 **Fig. S8. Global cryoEM densities.** Orthogonal views of cryoEM densities filtered to local  
978 resolutions for the nine refined complexes (names indicated). Same views as in Fig. S1B-J.  
979 None of the maps revealed density for NusG<sup>CTD</sup>, and similar structures were obtained from  
980 complexes assembled with NusG lacking the CTD. The C-terminal NusA AR1 and AR2  
981 domains were poorly resolved in reconstructions and were tentatively placed into regions of  
982 “fuzzy” density, based on their known positions in ECs (22-24). We could clearly assign RNA  
983 in the hybrid and close to the RNA exit tunnel next to the  $\beta^{\text{ZBD}}$ .

984



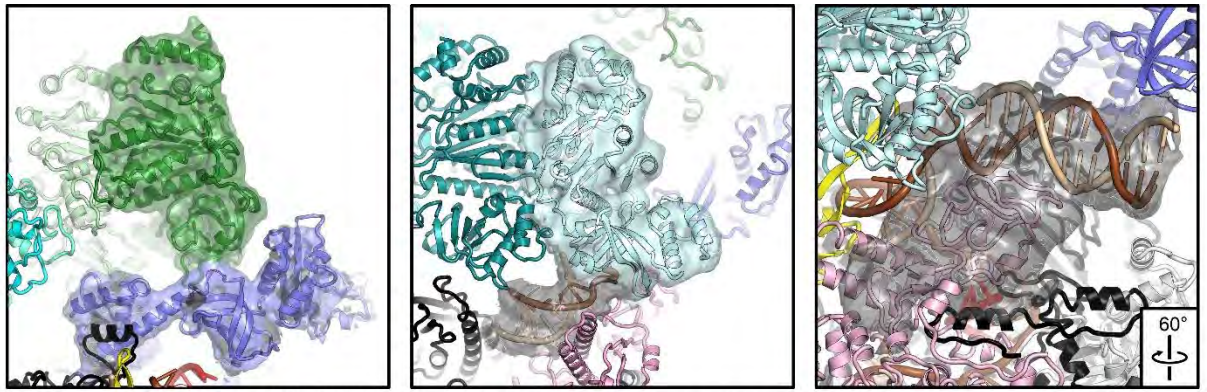

I:  $\rho_6$  and NusA<sup>NTD-S1-KH</sup>

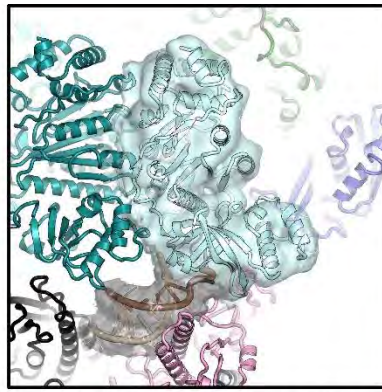

I<sup>ΔNusG</sup>:  $\rho_1$  and uDNA

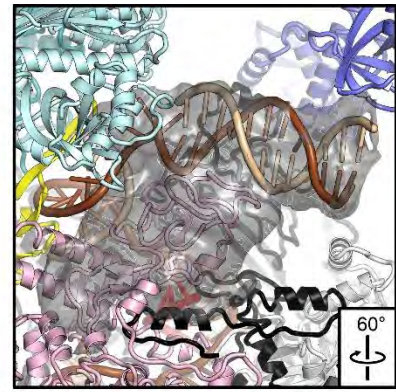

II: ZBD and dist. uDNA

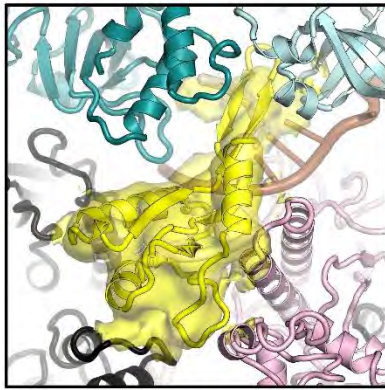

III: NusG

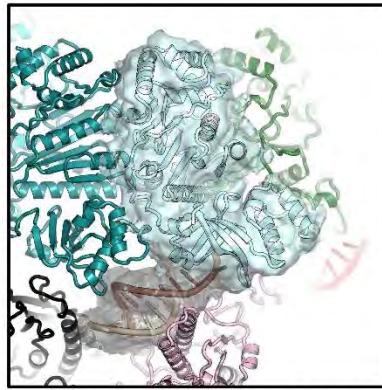

III<sup>ΔNusG</sup>:  $\rho_1$  and uDNA

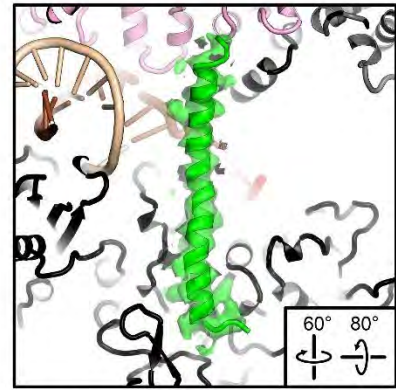

IIIa: Bridge helix

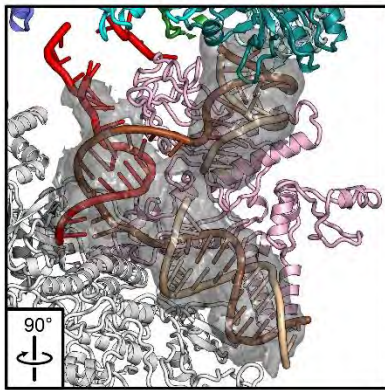

IV: dDNA, hybrid, uDNA

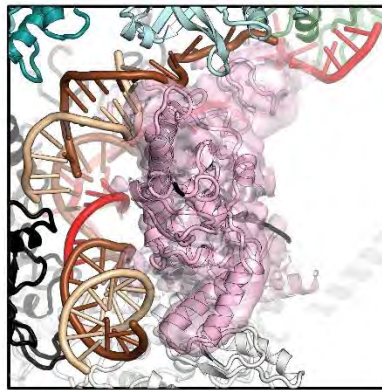

IVa: Clamp

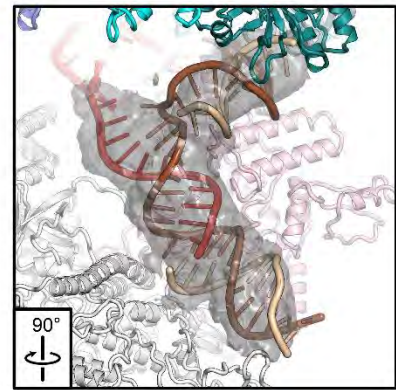

V: dDNA, hybrid, uDNA

985

986

987 **Fig. S9. Local cryoEM densities.** Selected regions of the cryoEM densities of the nine refined  
 988 complexes filtered to the local resolution. Complexes and regions shown are identified below  
 989 the panels.

990

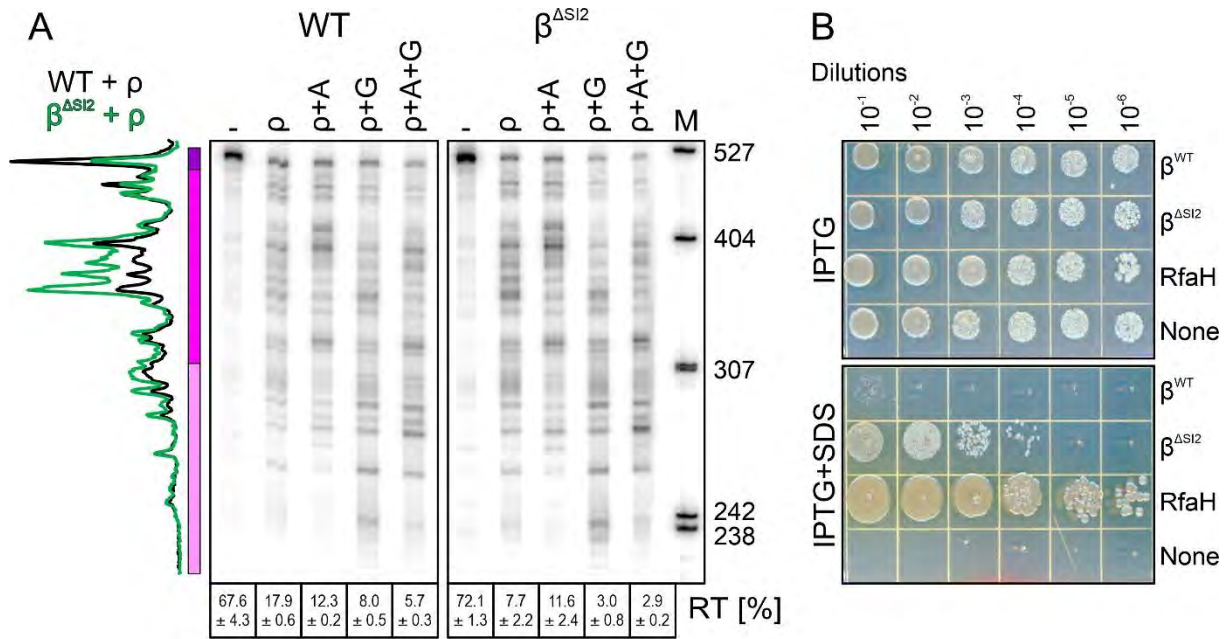

991

992

993 **Fig. S10. Effects of RNAP variants on pausing and termination *in vitro* and growth *in vivo*.**  
994 **(A,B)** Effects of  $\beta$  SI2 deletion on  $\rho$  termination *in vitro* **(A)** and *in vivo* **(B)**. *In vivo* termination  
995 was assayed in MG1655  $\Delta rfaH$  strain in which resistance to SDS depends on reduced  $\rho$   
996 termination in the *waa* operon (71). Serial dilution of cells carrying plasmids with indicated  
997 proteins expressed from an IPTG-inducible  $P_{trc}$  promoter (or an empty vector) were spotted on  
998 LB agar plates supplemented with carbenicillin and IPTG (with or without 0.5 % SDS) and  
999 incubated at 37 °C. **(C)** Synthetic growth defects observed for three representative  $\beta'$  variants  
1000 (C72H, C85H, E86K) quantified using a spotting assay. Equal volumes of several dilutions  
1001 (left) of saturated cultures were spotted on LB agar plates and incubated at 37 °C. **(D)** Effects  
1002 of deleting the  $\beta'$  lid ( $\Delta lid$ ), jaw ( $\Delta jaw$ ), or SI3 ( $\Delta SI3$ ), or of  $\beta^{V550A}$  on RNAP pausing during  
1003 single-round transcription of an *ops/his* pause-containing template (scheme on top) *in vitro*.  
1004 Consistent with earlier studies (41, 42, 72, 73), the deletion of the  $\beta'$  lid did not alter elongation  
1005 properties of RNAP, whereas the deletions of the  $\beta'$  jaw and SI3, as well as  $\beta^{V550A}$  substitution  
1006 led to defects in pausing.  
1007



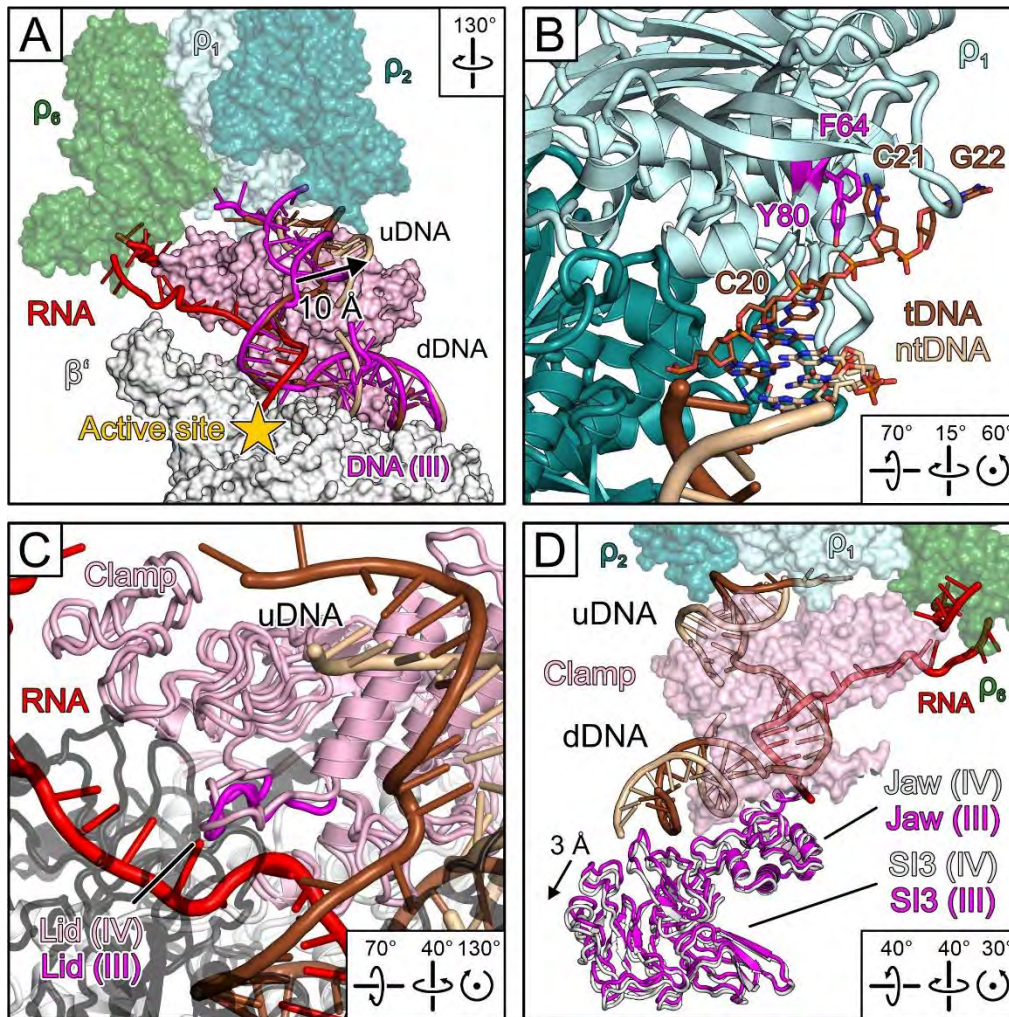

1008

1009

1010 **Fig. S11. Inhibition and moribund complex.** (A, C, D) Comparison of selected elements of  
 1011 the inhibited complex (regular colors) with selected elements of the RNA capture complex  
 1012 (magenta), illustrating movement (arrows) of the proximal uDNA that is in conflict with  
 1013 NusG<sup>NTD</sup> binding (A), rearrangement of the lid (C), and movement of  $\beta'$  jaw and SI3 (D). (B)  
 1014 Partial retraction of the DNA template strand from the  $\rho_1$  PBS. tDNA and selected  $\rho_1$  PBS  
 1015 residues as sticks colored by atom type. Carbon tDNA, brown.

1016

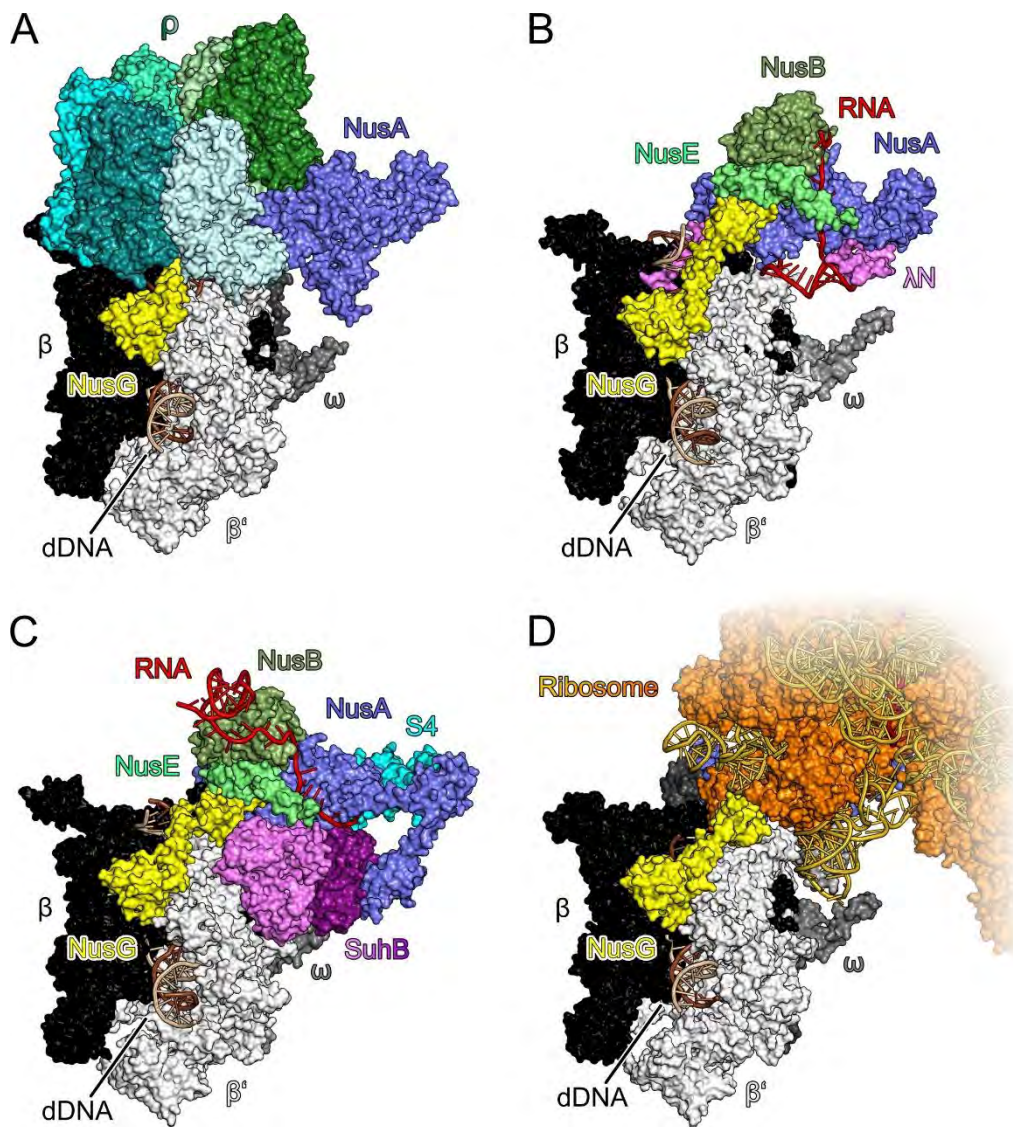

1017

1018

1019 **Fig. S12. Comparison to anti-termination complexes and expressomes. (A-D)** Side-by-side  
 1020 comparison of the structures of the engagement complex (A), a  $\lambda$ N-based anti-termination  
 1021 complex ( $\lambda$ N-TAC; PDB ID 6GOV) (24) (B), a ribosomal RNA EC (*rrn*EC; PDB ID 6TQN)  
 1022 (23). (C), and an expressome (PDB ID 6X7K) (37). (D). Structures were superimposed based  
 1023 on the  $\beta$  subunits. RNAP-associated RNA-factor complexes in the  $\lambda$ N-TAC and *rrn*EC, or the  
 1024 ribosome in expressomes (37, 38, 74) physically block EC engagement by  $\rho$  as revealed in the  
 1025 structures described here.  $\rho$  competition by a closely trailing ribosome provides an explanation

1026 for the long-known polarity effect (75), *i.e.* stalling of translation on an upstream gene in an  
1027 operon leading to downregulation of transcription in downstream genes.  
1028

1029 **Supplementary Tables**1030 **Table S1.**1031 **Cryo-EM data collection and refinement.**

| Data Collection                                 |         |          |         |         |         |                    |                      |          |          |
|-------------------------------------------------|---------|----------|---------|---------|---------|--------------------|----------------------|----------|----------|
| Pixel size (Å/px)                               | 1.24    |          |         |         |         |                    |                      |          |          |
| Defocus range (µm)                              | 0.5-2.5 |          |         |         |         |                    |                      |          |          |
| Voltage (kV)                                    | 300     |          |         |         |         |                    |                      |          |          |
| Electron dose (e <sup>-</sup> /Å <sup>2</sup> ) | 50      |          |         |         |         |                    |                      |          |          |
| Number of frames                                | 50      |          |         |         |         |                    |                      |          |          |
| Micrographs                                     | 9887    |          |         |         |         |                    |                      |          |          |
| Refinement                                      |         |          |         |         |         |                    |                      |          |          |
| Class                                           | I       | II       | III     | IV      | V       | I <sup>ΔNusG</sup> | III <sup>ΔNusG</sup> | IIIa     | IVa      |
| Particle images                                 | 50,910  | 8,286    | 28,487  | 24,950  | 38,054  | 27,226             | 64,696               | 40,157   | 42,083   |
| Global resol. [Å] <sup>1</sup>                  | 3.9     | 5.7      | 4.1     | 4.4     | 4.4     | 4.4                | 3.9                  | 4.3      | 4.1      |
| Local resol. [Å] <sup>1</sup>                   | 2.4-7.8 | 2.3-10.5 | 2.7-8.4 | 2.6-9.6 | 2.7-9.6 | 2.6-10.5           | 2.7-10.3             | 2.7-10.5 | 2.7-10.5 |
| CC mask                                         | 0.73    | 0.79     | 0.79    | 0.77    | 0.76    | 0.72               | 0.79                 | 0.76     | 0.77     |
| CC volume                                       | 0.68    | 0.79     | 0.78    | 0.76    | 0.75    | 0.72               | 0.79                 | 0.76     | 0.76     |
| Model composition                               |         |          |         |         |         |                    |                      |          |          |
| Non-H atoms                                     | 52,293  | 52,592   | 52,418  | 51,610  | 51,405  | 51,365             | 51,565               | 51,610   | 51,553   |
| Protein residues                                | 6,443   | 6,442    | 6,442   | 6,330   | 6,315   | 6,331              | 6,330                | 6,330    | 6,315    |
| DNA residues                                    | 59      | 84       | 60      | 61      | 57      | 58                 | 59                   | 61       | 60       |
| RNA residues                                    | 17      | 9        | 28      | 28      | 28      | 17                 | 28                   | 28       | 32       |
| Zn <sup>2+</sup> / Mg <sup>2+</sup> ions        | 2 / 7   | 2 / 6    | 2 / 6   | 2 / 6   | 2 / 6   | 2 / 7              | 2 / 6                | 2 / 6    | 2 / 6    |
| ADP-BeF <sub>3</sub>                            | 6       | 5        | 5       | 5       | 5       | 6                  | 5                    | 5        | 5        |
| RMSD <sup>2</sup>                               |         |          |         |         |         |                    |                      |          |          |
| Bond lengths [Å]                                | 0.003   | 0.002    | 0.002   | 0.002   | 0.003   | 0.003              | 0.002                | 0.002    | 0.002    |
| Bond angles [°]                                 | 0.598   | 0.605    | 0.581   | 0.568   | 0.625   | 0.593              | 0.546                | 0.530    | 0.536    |
| Ramachandran plot                               |         |          |         |         |         |                    |                      |          |          |
| Favored [%]                                     | 94.9    | 96.1     | 95.7    | 95.3    | 94.8    | 95.2               | 95.4                 | 95.8     | 95.3     |
| Allowed [%]                                     | 5.1     | 3.9      | 4.3     | 4.7     | 5.2     | 4.8                | 4.6                  | 4.2      | 4.6      |
| Outliers [%]                                    | 0.0     | 0.0      | 0.0     | 0.0     | 0.0     | 0.0                | 0.0                  | 0.0      | 0.0      |
| Model quality <sup>3</sup>                      |         |          |         |         |         |                    |                      |          |          |
| Clash score                                     | 15.3    | 16.8     | 4.1     | 12.5    | 15.9    | 13.8               | 12.8                 | 13.1     | 13.2     |
| Rotamer outl. [%]                               | 5.2     | 4.8      | 6.1     | 4.7     | 5.7     | 4.1                | 3.8                  | 3.5      | 3.1      |
| Overall score                                   | 2.6     | 2.5      | 2.5     | 2.4     | 2.6     | 2.5                | 2.4                  | 2.3      | 2.3      |
| EMDB ID                                         | 11087   | 11088    | 11089   | 11090   | 11091   | 11722              | 11723                | 11724    | 11725    |
| PDB ID                                          | 6Z9P    | 6Z9Q     | 6Z9R    | 6Z9S    | 6Z9T    | 7ADB               | 7ADC                 | 7ADD     | 7ADE     |

1032

1033

1034

1035

1036

<sup>1</sup> FSC<sub>0.143</sub> criterion.<sup>2</sup> RMSD – root-mean-square deviation from ideal geometry.<sup>3</sup> Assessed using MolProbity (76).



1037 **Table S2.**

1038 Regions of RNAP and factors discussed in the text.

| <b>RNAP</b>                           |                   |
|---------------------------------------|-------------------|
| <b><math>\beta</math></b>             |                   |
| Element                               | Residue range     |
| $\beta$ 1-lobe (protrusion)           | 31-139/456-512    |
| $\beta$ 2-lobe: $\beta$ i4 (lobe:SI1) | 151-444           |
| $\beta$ SI1                           | 226-350           |
| $\beta$ gate loop                     | 359-388           |
| $\beta$ protrusion                    | 450-507           |
| $\beta$ connector                     | 814-839/1048-1065 |
| $\beta$ flap                          | 830-1058          |
| $\beta$ flap tip                      | 887-915           |
| $\beta$ flap tip arms                 | 890-899/910-914   |
| $\beta$ SI2                           | 938-1040          |
| C-terminal $\beta$ clamp              | 1233-1342         |
| $\beta$ clamp                         | 1241-1341         |
| <b><math>\beta'</math></b>            |                   |
| Element                               | Residue range     |
| $\beta'$ ZBD                          | 35-107            |
| $\beta'$ zipper                       | 36-61             |
| $\beta'$ clamp                        | 16-342/1318-1344  |
| N-terminal $\beta'$ clamp             | 132-190           |
| $\beta'$ lid                          | 250-264           |
| $\beta'$ clamp helices                | 265-307           |
| $\beta'$ rudder                       | 308-327           |
| $\beta'$ switch 2                     | 330-349           |
| $\beta'$ dock                         | 369-420           |
| $\beta'$ shelf                        | 787-931           |
| $\beta'$ SI3                          | 943-1130          |
| $\beta'$ jaw                          | 1135-1317         |
| $\beta'$ C                            | 1318-1375         |
| <b><math>\alpha</math></b>            |                   |
| Element                               | Residue range     |
| NTD                                   | 6-232             |
| NTD-CTD linker                        | 233-251           |
| CTD                                   | 252-321           |
| <b><math>\omega</math></b>            |                   |
| Element                               | Residue range     |
| Globular domain                       | 1-60              |
| C-terminal helix                      | 61-91             |
| <b>Factors</b>                        |                   |
| <b>NusA</b>                           |                   |
| Element                               | Residue range     |
| NTD                                   | 1-121             |
| NTD-S1 linker helix*                  | 104-132           |
| S1                                    | 133-200           |
| KH1                                   | 201-277           |
| KH2                                   | 278-339           |
| KH2-AR1 linker helix                  | 340-363*          |
| AR1                                   | 354-416           |
| AR1-AR2 linker helix                  | 400-428           |
| AR2                                   | 429-495           |
| <b>NusG</b>                           |                   |

| Element        | Residue range |
|----------------|---------------|
| NTD            | 4-119         |
| HL             | 46-65         |
| NTD-CTD linker | 120-125       |
| CTD            | 126-181       |
| <b>ρ</b>       |               |
| Element        | Residue range |
| NTD            | 1-128         |
| NTD-CTD linker | 129-140       |
| CTD            | 141-419       |

1039  
1040  
1041  
1042

\* The N-terminal part of the NTD-S1 linker helix is also part of the NTD; the C-terminal part of the KH2-AR1 linker helix is also part of AR1.

1043 **Table S3.**

1044 Growth defects of  $\beta^{ZBD}$  variants in the presence of  $\rho^{Y80C}$ .

| $\rho$           | WT     |      |      | Y80C |      |      |     |
|------------------|--------|------|------|------|------|------|-----|
|                  | T [°C] | 30   | 37   | 42   | 30   | 37   | 42  |
| WT               |        | ++++ | ++++ | ++++ | ++++ | ++++ | +/- |
| C70A             |        | ++++ | ++   | +    | ++++ | +    | -   |
| C70H             |        | ++++ | ++   | +    | ++++ | +    | -   |
| C72A             |        | ++++ | ++   | +    | ++++ | -    | -   |
| C72H             |        | ++++ | ++++ | +/-  | ++++ | -    | -   |
| Y75N             |        | ++++ | ++++ | ++++ | ++++ | ++++ | +/- |
| G82D             |        | ++++ | ++++ | ++++ | ++++ | ++++ | +/- |
| C85A             |        | ++++ | ++   | +    | ++++ | +    | -   |
| C85H             |        | ++++ | ++++ | +    | ++++ | +    | -   |
| E86K             |        | ++++ | ++++ | +++  | ++++ | +    | -   |
| C88A             |        | ++++ | ++   | +    | +++  | -    | -   |
| C88H             |        | ++++ | ++   | ++   | +++  | ++   | -   |
| C2A <sup>1</sup> |        | ++++ | ++   | ++   | +++  | ++   | -   |
| C3A <sup>2</sup> |        | ++++ | ++   | ++   | +++  | -    | -   |
| C4A <sup>3</sup> |        | ++++ | ++   | ++   | +++  | -    | -   |

1045

1046 <sup>1</sup> C2A: C70A-C72A

1047 <sup>2</sup> C3A: C70A-C72A-85A

1048 <sup>3</sup> C4A: C70A-C72A-C85A-C88A.

1049

1050 **Table S4.**

1051 Plasmids used for protein production.

| Plasmid         | Relevant Features                                       | Reference  |
|-----------------|---------------------------------------------------------|------------|
| pVS10           | <i>E. coli</i> wild-type RNAP expression construct      | (55)       |
| pET24b-NusG     | <i>E. coli</i> NusG <sup>FL</sup> expression construct  | (13)       |
| pGEX-6p1-NusG   | <i>E. coli</i> NusG <sup>FL</sup> expression construct  | (57)       |
| pET24b-NusG NTD | <i>E. coli</i> NusG <sup>NTD</sup> expression construct | (13)       |
| pMT037          | <i>E. coli</i> NusG <sup>ΔHL</sup> expression construct | This study |
| pET24b-Rho      | <i>E. coli</i> Rho expression construct                 | (13)       |
| pETM11-Rho      | <i>E. coli</i> Rho expression construct                 | (24)       |
| pTKK19_NusA     | <i>E. coli</i> NusA expression construct                | (77)       |
| pETM11-NusA     | <i>E. coli</i> NusA <sup>FL</sup> expression construct  | (57)       |
| pIA578          | <i>E. coli</i> GreA expression construct                | (78)       |
| pIA579          | <i>E. coli</i> GreB expression construct                | (78)       |
| pAD6            | <i>E. coli</i> Mfd expression construct                 | (79)       |
| pGB003          | <i>E. coli</i> RapA expression construct                | This study |
| pIA1159         | <i>E. coli</i> RNAP Δα CTD expression construct         | This study |
| pIA314          | <i>E. coli</i> RNAP Δβ SI2 expression construct         | (80)       |
| pAM022          | <i>E. coli</i> RNAP β V550A expression construct        | (41)       |
| pVS14           | <i>E. coli</i> RNAP Δβ' SI3 expression construct        | (42)       |
| pIA299          | <i>E. coli</i> RNAP Δω expression construct             | (80)       |
| pIA1024         | <i>E. coli</i> RNAP Δβ' jaw expression construct        | (81)       |
| pHM001          | <i>E. coli</i> RNAP Δβ lid expression construct         | (82)       |
| pIA267          | λ tR1 template for <i>in vitro</i> termination assays   | (69)       |

1052

1053

1054 **Table S5.**1055 *E. coli* strains and plasmids used for genetic screens.

| Strain   | Relevant Genotype                                                                                                                            | Reference    |
|----------|----------------------------------------------------------------------------------------------------------------------------------------------|--------------|
| RS1606   | MC4100, <i>rho</i> <sup>WT</sup> , <i>P<sub>RM</sub>-racR-t<sub>rac</sub>-lacZYA</i> , <i>rpoC</i> <sup>ts</sup> , <i>tet</i> <sup>R</sup>   | This study   |
| RS1714   | MC4100 <i>gal EP3</i> , <i>rho</i> <sup>Y80C</sup>                                                                                           | This study   |
| RS1729   | MC4100 <i>rho</i> <sup>Y80C</sup> , <i>P<sub>RM</sub>-racR-t<sub>rac</sub>-lacZYA</i>                                                        | This study   |
| RS1758   | MC4100, <i>rho</i> <sup>Y80C</sup> , <i>P<sub>RM</sub>-racR-t<sub>rac</sub>-lacZYA</i> , <i>rpoC</i> <sup>ts</sup> , <i>tet</i> <sup>R</sup> | This study   |
| RS1428   | MC4100, <i>rho</i> <sup>WT</sup> ; <i>P<sub>RM</sub>-racR-t<sub>rac</sub>-lacZYA</i>                                                         | (35)         |
| DJ354    | MG1655, <i>rpoC</i> 120 btu.:Tn10 ( <i>ter</i> <sup>R</sup> , <i>ts</i> )                                                                    | From Din Jin |
| Plasmids |                                                                                                                                              |              |
| pRS513   | pBAD18M- <i>rpoC</i> <sup>WT</sup> with C-terminal HMK-His tag, <i>amp</i> <sup>R</sup>                                                      | (83)         |
| pRS1973  | pBAD18M- <i>rpoC</i> <sup>C70A</sup> , <i>amp</i> <sup>R</sup>                                                                               | This study   |
| pRS1974  | pBAD18M- <i>rpoC</i> <sup>C70H</sup> , <i>amp</i> <sup>R</sup>                                                                               | This study   |
| pRS1975  | pBAD18M- <i>rpoC</i> <sup>C72A</sup> , <i>amp</i> <sup>R</sup>                                                                               | This study   |
| pRS1976  | pBAD18M- <i>rpoC</i> <sup>C72H</sup> , <i>amp</i> <sup>R</sup>                                                                               | This study   |
| pRS1977  | pBAD18M- <i>rpoC</i> <sup>C85A</sup> , <i>amp</i> <sup>R</sup>                                                                               | This study   |
| pRS1978  | pBAD18M- <i>rpoC</i> <sup>C85H</sup> , <i>amp</i> <sup>R</sup>                                                                               | This study   |
| pRS1979  | pBAD18M- <i>rpoC</i> <sup>C88A</sup> , <i>amp</i> <sup>R</sup>                                                                               | This study   |
| pRS1980  | pBAD18M- <i>rpoC</i> <sup>C88H</sup> , <i>amp</i> <sup>R</sup>                                                                               | This study   |
| pRS1981  | pBAD18M- <i>rpoC</i> <sup>C70A,C72A</sup> , <i>amp</i> <sup>R</sup>                                                                          | This study   |
| pRS1982  | pBAD18M- <i>rpoC</i> <sup>C70A,C72A,C88A</sup> , <i>amp</i> <sup>R</sup>                                                                     | This study   |
| pRS1983  | pBAD18M- <i>rpoC</i> <sup>C70A,C72A,C85A,C88A</sup> , <i>amp</i> <sup>R</sup>                                                                | This study   |
| pRS1984  | pBAD18M- <i>rpoC</i> <sup>E86K</sup> , <i>amp</i> <sup>R</sup>                                                                               | This study   |
| pRS1985  | pBAD18M- <i>rpoC</i> <sup>G82D</sup> , <i>amp</i> <sup>R</sup>                                                                               | This study   |
| pRS1986  | pBAD18M- <i>rpoC</i> <sup>Y75N</sup> , <i>amp</i> <sup>R</sup>                                                                               | This study   |

1056

1057

1058 **Captions for Movies S1 and S2**

1059 **Movie S1.**

1060 Overview of the engagement complex. Rendering of individual images was done with PyMOL.

1061 The movie was compiled with Windows Movie Maker.

1062

1063 **Movie S2.**

1064 Model for EC-dependent,  $\rho$ -mediated termination. The movie shows stages of an EC-

1065 dependent,  $\rho$ -mediated transcription termination pathway as deduced from our cryoEM

1066 analysis. Coordinates were morphed using PyMOL. Rendering of individual images was done

1067 with PyMOL. The movie was compiled with Windows Movie Maker.
